# Supplementary material for: Dynamical evolution of CO2 and H2O on garnet electrolyte elucidated by ambient pressure X-ray spectroscopies
Source: PubMed Central journal article supplement (PMC10981710; doi:10.1038/s41467-024-47071-4), 2024-03-30
Supplement: 41467_2024_47071_MOESM1_ESM.pdf [file 41467_2024_47071_MOESM1_ESM.pdf]

---

**Supplementary Information for**  
**Dynamical Evolution of CO<sub>2</sub> and H<sub>2</sub>O on Garnet Electrolyte**  
**Elucidated by Ambient Pressure X-ray Spectroscopies**

Nian Zhang,<sup>1,2†</sup> Guoxi Ren,<sup>2†</sup> Lili Li,<sup>3†</sup> Zhi Wang,<sup>4</sup> Pengfei Yu,<sup>2</sup> Xiaobao Li,<sup>2</sup> Jing  
Zhou,<sup>3</sup> Hui Zhang,<sup>1,2\*</sup> Linjuan Zhang,<sup>3</sup> Zhi Liu,<sup>5\*</sup> and Xiaosong Liu<sup>2,5,6\*</sup>.

<sup>1</sup> Shanghai Synchrotron Radiation Facility, Shanghai Advanced Research Institute,  
Chinese Academy of Sciences, Shanghai 201204, China

<sup>2</sup> State Key Laboratory of Functional Materials for Informatics, Shanghai Institute of  
Microsystem and Information Technology, Chinese Academy of Sciences, Shanghai  
200050, China

<sup>3</sup> Shanghai Institute of Applied Physics, Chinese Academy of Sciences, Shanghai  
201204, China

<sup>4</sup> Institute of Semiconductors, Chinese Academy of Sciences, Beijing 100089, China

<sup>5</sup> School of Physical Science and Technology, Shanghai Tech University, Shanghai  
201210, China

<sup>6</sup> National Synchrotron Radiation Laboratory, University of Science and Technology  
of China, Hefei, 230026, China

†These authors contributed equally: Nian Zhang, Guoxi Ren, Lili Li

\*Corresponding author: Hui Zhang, Zhi Liu, Xiaosong Liu

E-mail addresses: [huizhang@mail.sim.ac.cn](mailto:huizhang@mail.sim.ac.cn) (Hui Zhang),

[liuzhi@shanghaitech.edu.cn](mailto:liuzhi@shanghaitech.edu.cn) (Zhi Liu), [xslu19@ustc.edu.cn](mailto:xslu19@ustc.edu.cn) (Xiaosong Liu).

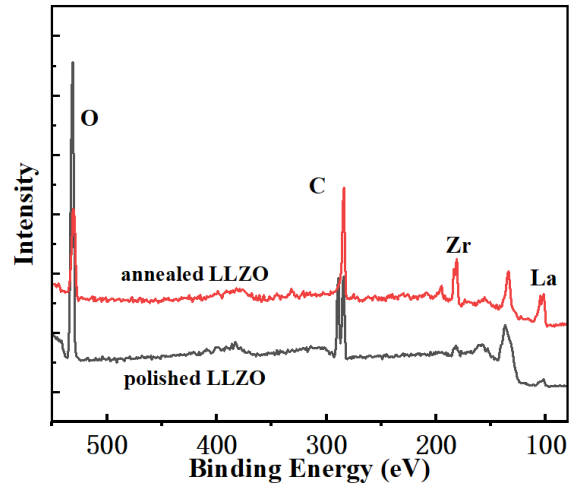

**Supplementary Fig. 1 | Comparison of XPS survey on LLZO surface before and after annealing at room temperature.** After vacuum annealing and cooling to room temperature, the signals of  $\text{Li}_2\text{CO}_3$  almost disappear, La and Zr on the surface of LLZO are significantly enhanced.

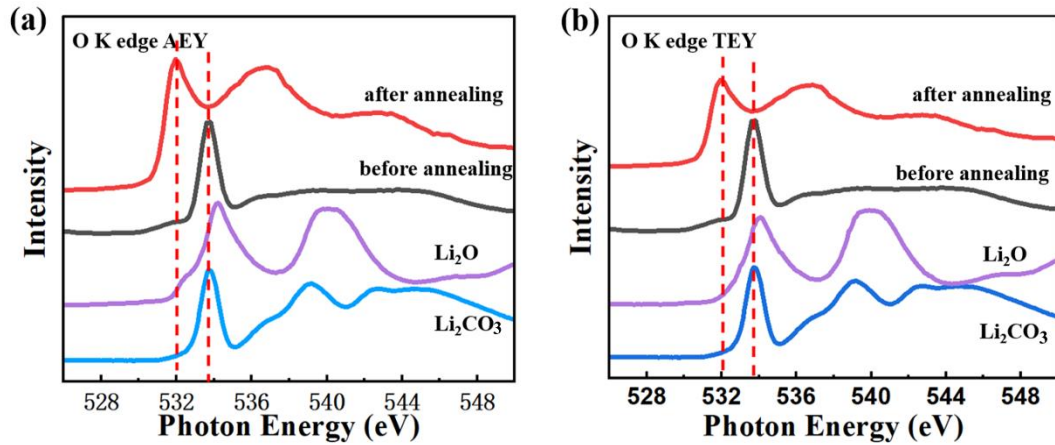

**Supplementary Fig. 2 | Comparison of AEY and TEY spectra on LLZO surface before and after annealing at room temperature. a** O K edge AEY and **b** TEY spectra of LLZO before and after vacuum annealing at room temperature.  $\text{Li}_2\text{O}$  and  $\text{Li}_2\text{CO}_3$  are listed as reference samples. A small signal of LLZO can be found at ~531.9 eV in both AEY and TEY spectrum before annealing, indicating that the thickness of the contamination layer is several nanometers. After vacuum annealing at room temperature,  $\text{Li}_2\text{CO}_3$  is hardly visible in the AEY and TEY spectra, indicating that very little  $\text{Li}_2\text{CO}_3$  is generated on the surface during the cooling process.

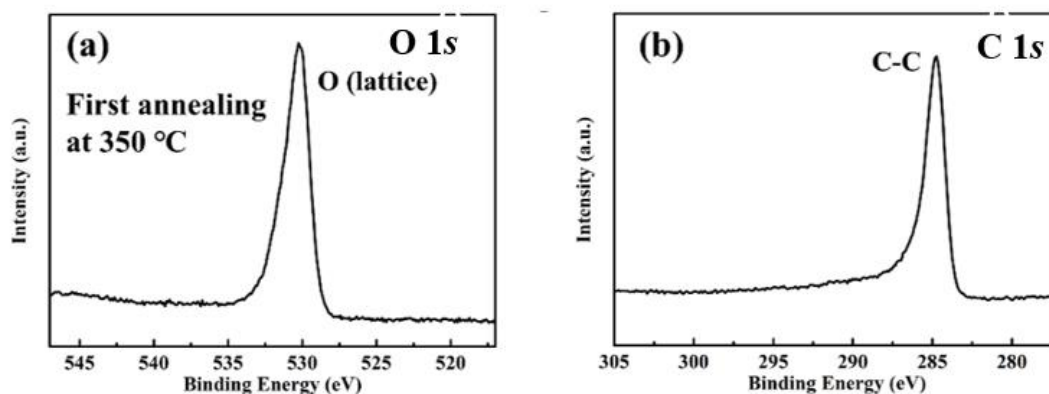

**Supplementary Fig. 3 | XPS spectra of LLZO surface when first vacuum annealing at 350 °C. a O 1s and b C 1s XPS spectra of LLZO when first vacuum annealing at 350 °C corresponding to process b in Fig. 2 of the main text. The results indicate clean LLZO surface at high temperature with only contaminated C can be achieved by vacuum annealing.**

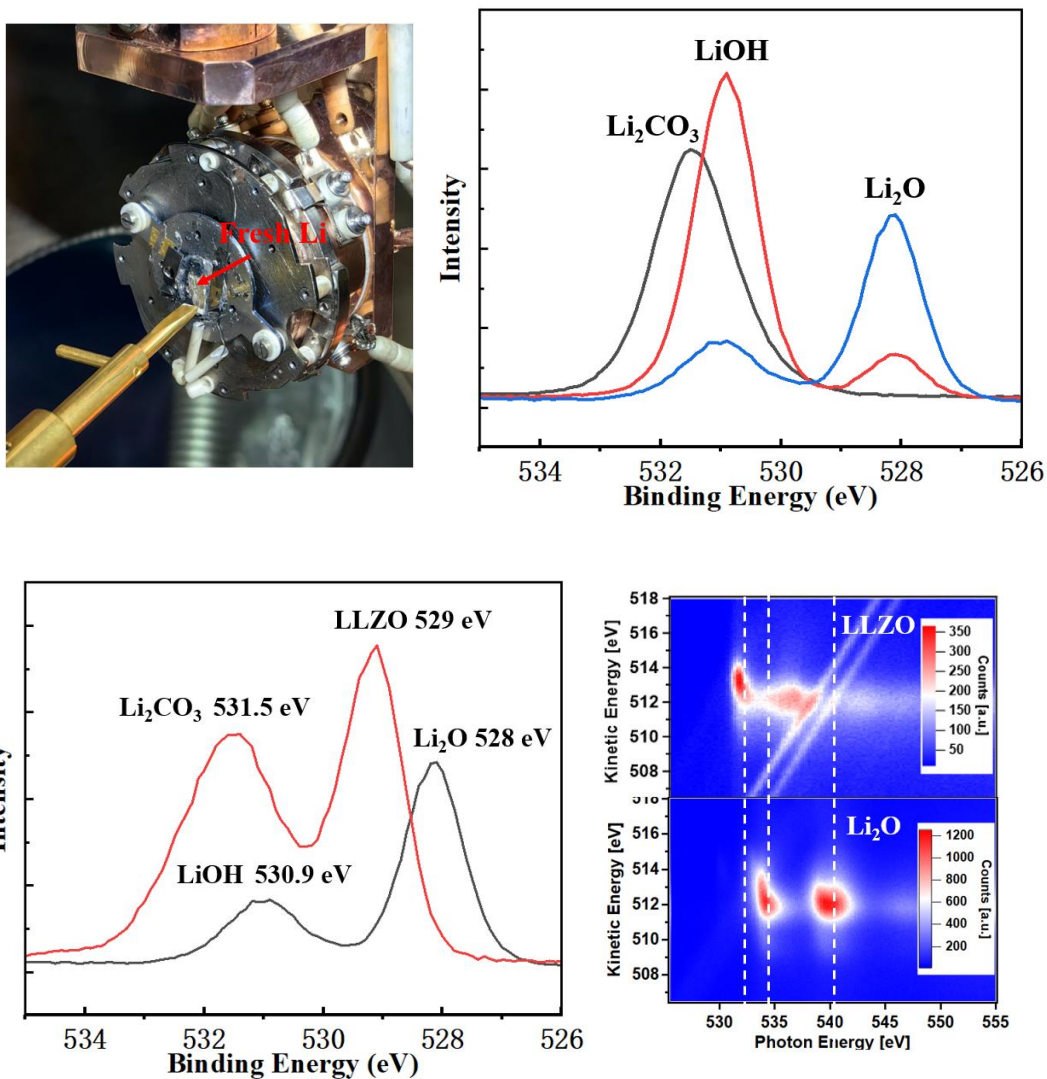

**Supplementary Fig. 4 | Obtaining pure standard spectra of lithium containing species through *in situ* treatment of metallic lithium and excluding the presence of  $\text{Li}_2\text{O}$  on the surface of annealed LLZO through mRAS.** Li metal was *in situ* scraped using a Wobble-Stick with sharp blade. By utilizing near ambient pressure technology, we can obtain pure  $\text{Li}_2\text{O}$ ,  $\text{LiOH}$  and  $\text{Li}_2\text{CO}_3$ . Through these XPS data of reference samples, we can fix  $\text{Li}_2\text{O}$  peak position at 528 eV with a FWHM of 1.35 eV;  $\text{LiOH}$  at 530.9 eV with a FWHM of 1.61 eV,  $\text{Li}_2\text{CO}_3$  at 531.5 eV with a FWHM of 1.75 eV. These parameters make the peak fitting in our article more accurate. The mRAS comparison of annealed LLZO and  $\text{Li}_2\text{O}$  excludes the generation of  $\text{Li}_2\text{O}$  during the annealing process.

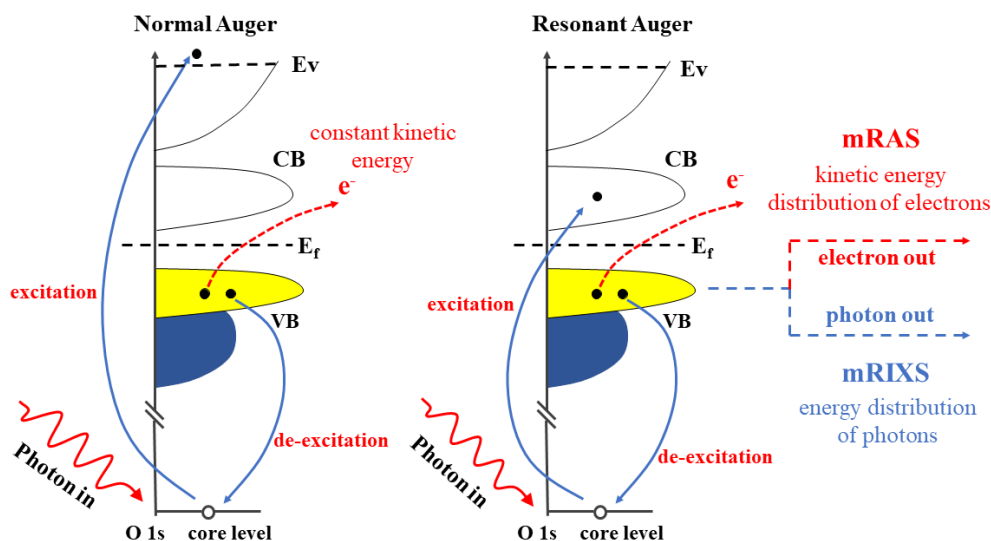

**Supplementary Fig. 5 | Schematic diagram of the fundamental process of normal Auger and resonant Auger.** Compared to normal Auger, resonance Auger contains valence band information of the sample. The core level electron can be excited under irradiation, followed by two parallel de-excitation channels (photon-in-electron-out vs. photon-in-photon-out), where the energy distribution of emitted electrons and photons can be further resolved into mapping of resonant Auger spectroscopy (mRAS) and mapping of resonant inelastic X-ray scattering (mRIXS). The two-dimensional maps provide energy resolution along both incident photon energy and emitted electron/photon axis, which can well disentangle the spectra overlapping effect. For soft X-ray, the photon yield is one percent of the electron yield and the efficiency of electronic energy analyzers is often much stronger than that of grating spectrometers, which means that mRAS has much lower requirements for photon flux and acquisition time than mRIXS. Using light from a bending magnet beamline, we can also complete a mRAS mapping in steps of 0.1 eV in 15 minutes. In addition, the mRAS and AEY method can be implemented at any synchrotron radiation XPS end-station with almost no need to add new hardware.

|                                              | Area of O<br>Li <sub>2</sub> CO <sub>3</sub> (O 1s) | Area of C<br>Li <sub>2</sub> CO <sub>3</sub> (C 1s) | O atom/C<br>atom |
|----------------------------------------------|-----------------------------------------------------|-----------------------------------------------------|------------------|
| <b>UHV after 1 mbar CO<sub>2</sub></b>       | 58397.4                                             | 5981.4                                              | 3.75             |
| <b>1 mbar CO<sub>2</sub></b>                 | 5120.6                                              | 1709.1                                              | 1.15             |
| <b>0.5 mbar CO<sub>2</sub></b>               | 17056.3                                             | 3317.9                                              | 1.98             |
| <b>1×10<sup>-2</sup> mbar CO<sub>2</sub></b> | 56698.7                                             | 5536.9                                              | 3.94             |
| <b>1×10<sup>-4</sup> mbar CO<sub>2</sub></b> | 45065                                               | 4385                                                | 3.95             |
| <b>1×10<sup>-6</sup> mbar CO<sub>2</sub></b> | 31251                                               | 3085                                                | 3.88             |
| <b>after O<sub>2</sub> annealing</b>         | 26203                                               | 2240.8                                              | 4.49             |
| <b>vacuum annealing</b>                      | 23912                                               | 2035                                                | 4.54             |
| <b>Pure Li<sub>2</sub>CO<sub>3</sub></b>     | 381281                                              | 59000                                               | 2.48             |

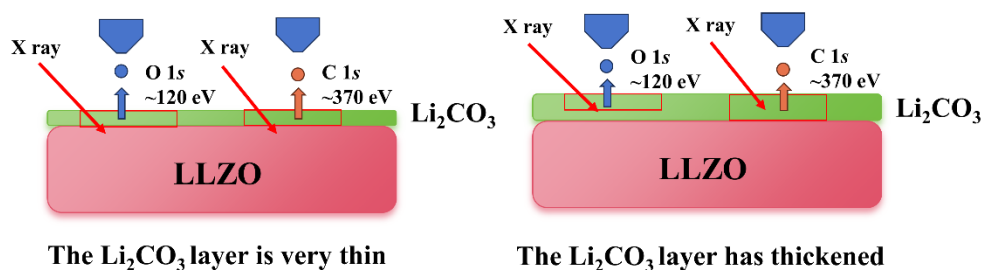

**Supplementary Fig. 6 | Atomic ratio of O/C for Li<sub>2</sub>CO<sub>3</sub> calculated through O 1s and C 1s during CO<sub>2</sub> reaction.** For CO<sub>2</sub> reaction, in the table, we calculated the atomic ratio of O/C using the photoionization cross-sections of O (0.3383) and C (0.1308) at 650 eV. The O/C is maintained at a stable value ~3.9 during the CO<sub>2</sub> pressure range 10<sup>-6</sup>-10<sup>-2</sup> mbar. The stability of the ratio means that within this pressure range, the surface is relatively pure Li<sub>2</sub>CO<sub>3</sub> without LiOH and the layer is very thin, and the X-ray can detect all information within the layer. Compared with pure Li<sub>2</sub>CO<sub>3</sub> ~2.48, the ratio is higher. This phenomenon can be explained simply by the figure.

---

When 650 eV X-ray is incident on the surface of the material, the photoelectron kinetic energy of O is about 120 eV, while that of C is 370 eV. The detected depth of C is larger, so for pure  $\text{Li}_2\text{CO}_3$ , the proportion of C will be higher. For the results above 0.5 mbar  $\text{CO}_2$ , O/C is affected by the gas peak, the higher the  $\text{CO}_2$  pressure, the lower the ratio. Interestingly, after we pumped 1 mbar  $\text{CO}_2$  back to the vacuum, the O/C ratio slightly decrease to 3.75, indicating that the thickness of the  $\text{Li}_2\text{CO}_3$  layer slightly exceeded the detection depth of O photoelectrons.



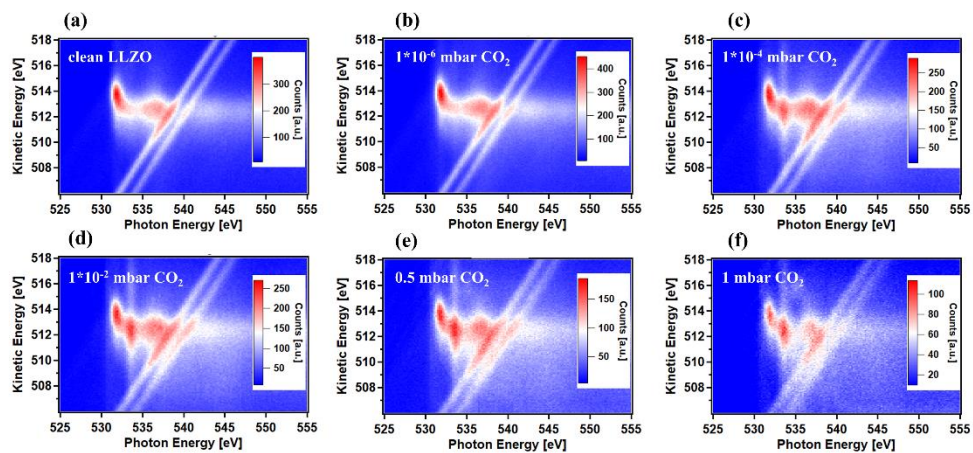

**Supplementary Fig. 7 | The AP-mRAS spectra of LLZO surface during the introduction of CO<sub>2</sub>.** Clear intensity increasing of Li<sub>2</sub>CO<sub>3</sub> can be observed from UHV to  $1 \times 10^{-2}$  mbar CO<sub>2</sub>. The ratio of LLZO/ Li<sub>2</sub>CO<sub>3</sub> becomes stable when the pressure over  $1 \times 10^{-2}$  mbar.

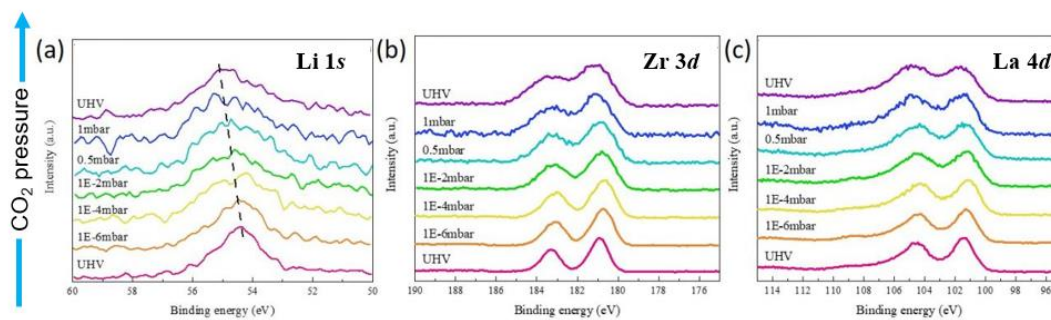

**Supplementary Fig. 8 | The variation of Li 1s, Zr 3d and La 4d APXPS spectra at increasing CO<sub>2</sub> pressure.** The peak position of Li 1s shifts to high binding energy indicates the change from LLZO to Li<sub>2</sub>CO<sub>3</sub>. No obvious changes can be found in Zr 3d and La 4d spectra. The signals of La and Zr are weakened with increasing CO<sub>2</sub> pressure (signal-to-noise ratio), indicating that lithium carbonate forms on the surface of LLZO.

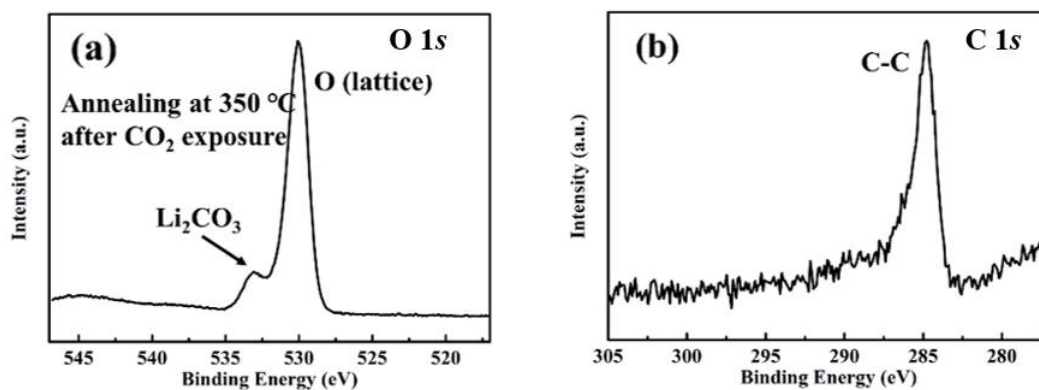

**Supplementary Fig. 9 | XPS spectra of LLZO surface when vacuum annealing at 350 °C after CO<sub>2</sub> experiment.** a O 1s and b C 1s XPS spectra of LLZO which is annealing at 350 °C after the CO<sub>2</sub> experiment, corresponding to process d in Fig. 2 of the main text. The results indicate that Li<sub>2</sub>CO<sub>3</sub> is difficult to decompose at 350 °C if H in the sub-surface of LLZO is completely removed.

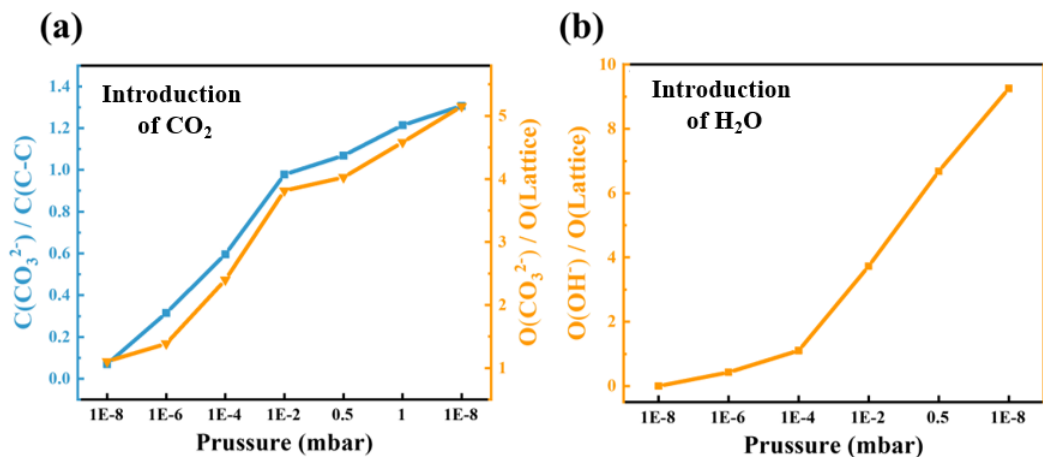

**Supplementary Fig. 10 | Evolution of surface species during the introduction of CO<sub>2</sub> and H<sub>2</sub>O.** **a** The variation of  $C(\text{CO}_3^{2-})/C(\text{C-C})$  and  $\text{O}(\text{CO}_3^{2-})/\text{O}(\text{Lattice})$  during the introduction of CO<sub>2</sub>. **b** The variation of  $\text{O}(\text{OH}^-)/\text{O}(\text{Lattice})$  during the introduction of H<sub>2</sub>O. The variation trend of the two ratios is very consistent in CO<sub>2</sub> procedure. The ratios of  $C(\text{CO}_3^{2-})/C(\text{C-C})$  and  $\text{O}(\text{CO}_3^{2-})/\text{O}(\text{Lattice})$  increase quickly at low CO<sub>2</sub> pressure from  $1 \times 10^{-8}$  mbar to  $1 \times 10^{-2}$  mbar and stay stable from  $1 \times 10^{-2}$  to 1 mbar. However, for H<sub>2</sub>O, the ratios of  $\text{O}(\text{OH}^-)/\text{O}(\text{Lattice})$  change slowly at the pressure below  $1 \times 10^{-4}$  mbar and increase quickly as the increasing of the pressure to 0.5 mbar.

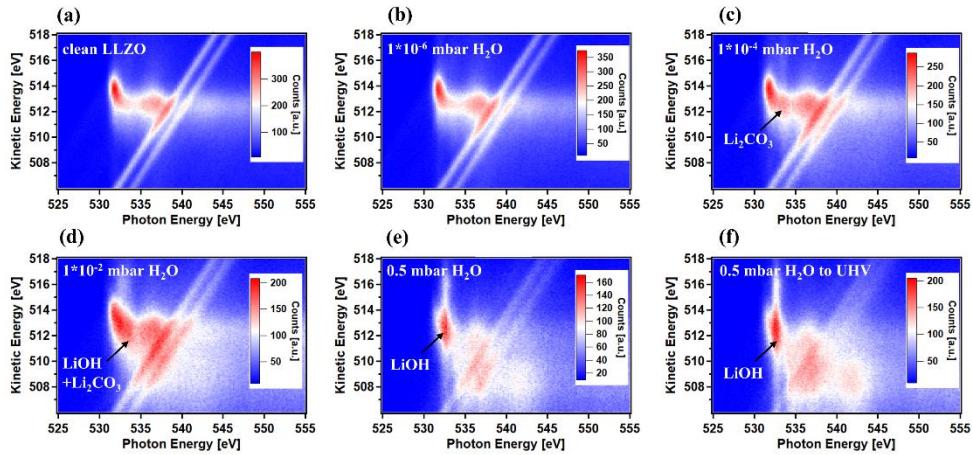

**Supplementary Fig.11 | The AP-mRAS spectra of LLZO surface during the introduction of H<sub>2</sub>O.** Li<sub>2</sub>CO<sub>3</sub> can be observed at  $1 \times 10^{-4}$  mbar H<sub>2</sub>O due to the gas path can only be cleaned to  $1 \times 10^{-7}$  mbar and there is a small amount of residual CO<sub>2</sub>. The results also indicate that the reaction of  $\text{Li}_{6.5}\text{La}_3\text{Zr}_{1.5}\text{Ta}_{0.5}\text{O}_{12} + x\text{CO}_2 \rightarrow \text{Li}_{6.5-2x}\text{La}_3\text{Zr}_{1.5}\text{Ta}_{0.5}\text{O}_{12-x} + x\text{Li}_2\text{CO}_3$  at clean LLZO surface may be a thermodynamically favorable route compared to the reaction of LLZO with H<sub>2</sub>O. When the pressure increases to 0.5 mbar, the signal of LiOH almost completely covers that of LLZO.

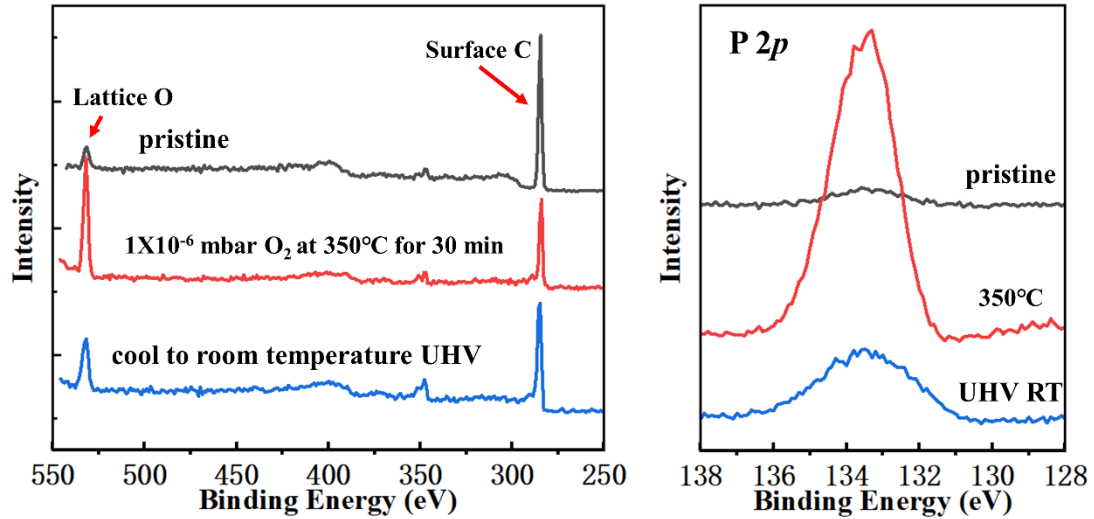

**Supplementary Fig.12 | Evolution of surface species on LAGP during annealing and cooling processes.** It can be seen that the surface C of the sample at 350 °C significantly decreases, while the signals of O and P are significantly enhanced. However, when the sample was cooled to room temperature, the signal of C increased significantly while the signal of O and P decreased. No such carbonization phenomenon is observed on the surface of LLZO.

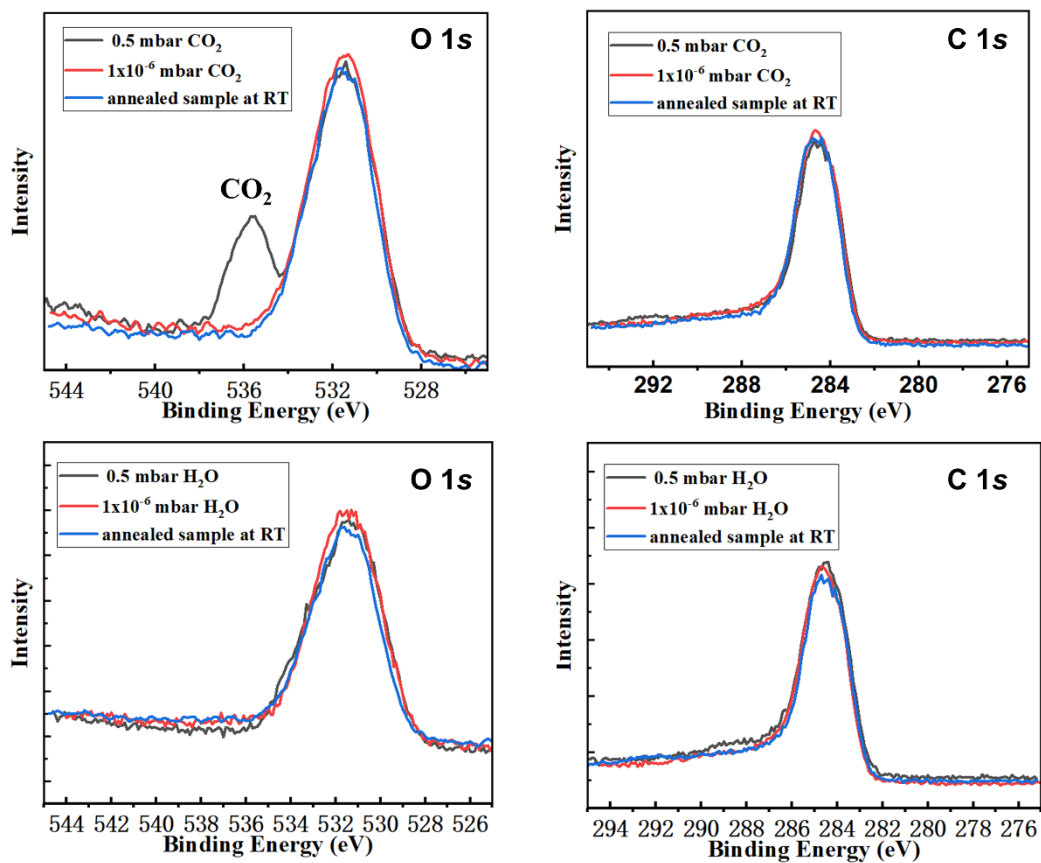

**Supplementary Fig.13 | *In situ* ambient pressure experiment of LAGP sample with CO<sub>2</sub> and H<sub>2</sub>O.** No changes can be found in O 1s and C 1s spectra. Thus, LAGP cannot react with CO<sub>2</sub> and H<sub>2</sub>O even at a high pressure of 0.5 mbar.

|                                                            | Area of<br>Li <sub>2</sub> CO <sub>3</sub> | Area of LiOH | Area<br>Li <sub>2</sub> CO <sub>3</sub> /LiOH | Molar ratio |
|------------------------------------------------------------|--------------------------------------------|--------------|-----------------------------------------------|-------------|
| <b>UHV</b>                                                 | 40207.7                                    | 2369.6       | 16.96                                         | 5.65        |
| <b>0.5 mbar H<sub>2</sub>O+0.5<br/>mbar CO<sub>2</sub></b> | 3981.7                                     | 363          | 10.97                                         | 3.66        |
| <b>UHV</b>                                                 | 12856.6                                    | 36133.1      | 0.35                                          | 0.12        |
| <b>0.5 mbar H<sub>2</sub>O</b>                             | 1178.2                                     | 28552.1      | 0.04                                          | 0.01        |
| <b>1X10<sup>-2</sup> mbar H<sub>2</sub>O</b>               | 19551.1                                    | 39485.7      | 0.50                                          | 0.17        |
| <b>1X10<sup>-4</sup> mbar H<sub>2</sub>O</b>               | 30297.5                                    | 12850.1      | 2.36                                          | 0.78        |
| <b>1X10<sup>-6</sup> mbar H<sub>2</sub>O</b>               | 32278.6                                    | 6112.3       | 5.28                                          | 1.76        |
| <b>UHV</b>                                                 | 33434.8                                    | 0            | --                                            | --          |

**Supplementary Table 1 | Changes of Li<sub>2</sub>CO<sub>3</sub>/LiOH on the surface of LLZO**

**during the H<sub>2</sub>O reaction.** The processes are corresponding to Fig. 6 in the main text.

Li<sub>2</sub>CO<sub>3</sub> rapidly increases under low pressure because our gas path can only be cleaned up to  $1 \times 10^{-7}$  mbar, and there still contains a small amount of CO<sub>2</sub> in the gas path.

LiOH increases continuously, indicating that there is almost no LiOH present on the UHV sample. After the introduction of H<sub>2</sub>O+CO<sub>2</sub>, LiOH almost changes to Li<sub>2</sub>CO<sub>3</sub>.
